# Supplementary material for: Neural activity mapping of bumble bee (Bombus ignitus) brains during foraging flight using immediate early genes
Source: PubMed Central journal article supplement (PMC7217898; doi:10.1038/s41598-020-64701-1), 2020-05-12
Supplement: 41598_2020_64701_MOESM1_ESM.pdf [file 41598_2020_64701_MOESM1_ESM.pdf]

# Neural activity mapping of bumble bee (*Bombus ignitus*) brains during foraging flight using immediate early genes

Shiori Iino<sup>1</sup>, Yurika Shiota<sup>1</sup>, Masakazu Nishimura<sup>2</sup>, Shinichi Asada<sup>3\*</sup>, Masato Ono<sup>2\*</sup> and Takeo Kubo<sup>1\*</sup>

<sup>1</sup> Department of Biological Sciences, Graduate School of Science, The University of Tokyo, Bunkyo-Ku, Tokyo, 113-0033, Japan.

<sup>2</sup> Laboratory of Entomology, Graduate School of Agriculture, Tamagawa University, Machida-Shi, Tokyo, 194-8610, Japan.

<sup>3</sup> Bioresource Sciences Major, Graduate School of Agriculture, Tamagawa University, Machida-Shi, Tokyo, 194-8610, Japan.

Correspondence and requests for materials should be addressed to T.K. (email: [stkubo@bs.s.u-tokyo.ac.jp](mailto:stkubo@bs.s.u-tokyo.ac.jp))

\*: Corresponding authors

Supplementary table S1

| Mean $\pm$ SEM | MB           |                 | Other brain region |                 |
|----------------|--------------|-----------------|--------------------|-----------------|
|                | Nurse bee    | Forager         | Nurse bee          | Forager         |
| <i>BiHR38</i>  | 1 $\pm$ 0.22 | 1.86 $\pm$ 0.13 | 0.13 $\pm$ 0.02    | 0.31 $\pm$ 0.02 |
| <i>BiEgr1</i>  | 1 $\pm$ 0.14 | 3.70 $\pm$ 0.31 | 0.48 $\pm$ 0.07    | 1.09 $\pm$ 0.07 |
| <i>BiEcR</i>   | 1 $\pm$ 0.10 | 1.44 $\pm$ 0.11 | 1.39 $\pm$ 0.10    | 1.67 $\pm$ 0.09 |

**Supplementary Table S1. The gene expression of *B. ignitus* in the greenhouse sampling normalized using *Actin***

Relative gene expression in each brain tissue of workers normalized to *BiActin* in the *B. ignitus* greenhouse sampling compared with the MBs of nurse bees.

Supplementary table S2

| Mean $\pm$ SEM   | MB           |                 |                 |                 | Other brain region |                 |                 |                 |
|------------------|--------------|-----------------|-----------------|-----------------|--------------------|-----------------|-----------------|-----------------|
|                  | 8:30         |                 | 8:37            | 9:00            | 8:30               |                 | 8:37            | 9:00            |
|                  | Nurse bee    | Forager         |                 |                 | Nurse bee          | Forager         |                 |                 |
| <i>BiHR38</i>    | 1 $\pm$ 0.16 | 2.38 $\pm$ 0.40 | 2.00 $\pm$ 0.31 | 2.47 $\pm$ 0.80 | 0.16 $\pm$ 0.01    | 0.22 $\pm$ 0.05 | 0.19 $\pm$ 0.02 | 0.30 $\pm$ 0.03 |
| <i>preBiHR38</i> | 1 $\pm$ 0.14 | 1.82 $\pm$ 0.28 | 2.03 $\pm$ 0.54 | 6.44 $\pm$ 1.54 | 0.20 $\pm$ 0.04    | 0.49 $\pm$ 0.19 | 0.65 $\pm$ 0.34 | 1.76 $\pm$ 0.67 |
| <i>BiEgr1</i>    | 1 $\pm$ 0.15 | 2.30 $\pm$ 0.48 | 1.94 $\pm$ 0.44 | 9.76 $\pm$ 3.38 | 0.65 $\pm$ 0.06    | 0.70 $\pm$ 0.10 | 0.53 $\pm$ 0.05 | 1.10 $\pm$ 0.12 |
| <i>BiEcR</i>     | 1 $\pm$ 0.09 | 1.03 $\pm$ 0.10 | 1.14 $\pm$ 0.10 | 1.29 $\pm$ 0.23 | 1.55 $\pm$ 0.14    | 1.83 $\pm$ 0.12 | 1.41 $\pm$ 0.13 | 1.72 $\pm$ 0.08 |

**Supplementary Table S2. The gene expression of *B. ignitus* in the laboratory flight-cage sampling normalized using *Actin***

Relative gene expression in each brain tissue of workers normalized to *BiActin* in the *B. ignitus* laboratory flight-cage sampling compared with the MBs of nurse bees collected at 8:30.

Supplementary table S3

| Mean<br>± SEM         | MB           |           |           |                |              |           |              |                |              |           |
|-----------------------|--------------|-----------|-----------|----------------|--------------|-----------|--------------|----------------|--------------|-----------|
|                       | 6:30         |           | 8:30      | 9:00           | 9:30         |           | 12:30        |                | 22:30        |           |
|                       | Nurse<br>bee | Forager   | Forager   | Forager        | Nurse<br>bee | Forager   | Nurse<br>bee | Forager        | Nurse<br>bee | Forager   |
| <i>AmHR38</i>         | 1±0.06       | 2.31±0.48 | 3.15±1.11 | 4.71±2.55      | 0.91±0.10    | 2.74±0.49 | 2.28±0.93    | 11.79<br>±2.01 | 2.75±0.33    | 2.93±0.41 |
| <i>preAmHR<br/>38</i> | 1±0.10       | 1.93±0.43 | 3.14±0.60 | 15.17<br>±9.01 | 1.17±0.21    | 6.26±1.71 | 1.32±0.15    | 7.88±1.74      | 0.76±0.17    | 1.08±0.21 |
| <i>AmEgr1</i>         | 1±0.29       | 0.86±0.21 | 1.54±0.36 | 3.46±2.12      | 0.76±0.06    | 1.79±0.31 | 0.96±0.09    | 6.18±1.53      | 0.76±0.14    | 0.90±0.37 |
| <i>AmEcR</i>          | 1±0.30       | 0.75±0.11 | 1.00±0.27 | 1.84±0.81      | 0.65±0.05    | 0.94±0.10 | 0.99±0.13    | 2.82±0.51      | 0.59±0.08    | 0.58±0.05 |

| Mean<br>± SEM         | Other brain region |           |           |           |              |           |              |           |              |           |
|-----------------------|--------------------|-----------|-----------|-----------|--------------|-----------|--------------|-----------|--------------|-----------|
|                       | 6:30               |           | 8:30      | 9:00      | 9:30         |           | 12:30        |           | 22:30        |           |
|                       | Nurse<br>bee       | Forager   | Forager   | Forager   | Nurse<br>bee | Forager   | Nurse<br>bee | Forager   | Nurse<br>bee | Forager   |
| <i>AmHR38</i>         | 0.17±0.06          | 0.36±0.13 | 0.54±0.12 | 0.53±0.15 | 0.24±0.04    | 0.57±0.08 | 0.43±0.10    | 1.39±0.33 | 0.45±0.05    | 0.23±0.00 |
| <i>preAmHR<br/>38</i> | 0.09±0.01          | 0.18±0.03 | 1.07±0.05 | 1.14±0.35 | 0.14±0.03    | 1.34±0.25 | 0.18±0.05    | 1.34±0.35 | 0.13±0.03    | 0.07±0.01 |
| <i>AmEgr1</i>         | 0.27±0.04          | 0.42±0.10 | 0.72±0.12 | 0.70±0.08 | 0.26±0.02    | 0.66±0.05 | 0.46±0.04    | 1.10±0.15 | 0.55±0.06    | 0.31±0.03 |
| <i>AmEcR</i>          | 0.55±0.06          | 0.96±0.18 | 0.83±0.09 | 0.88±0.10 | 0.65±0.13    | 0.66±0.02 | 1.17±0.08    | 1.09±0.23 | 1.43±0.42    | 0.75±0.10 |

**Supplementary Table S3. The gene expression of *A. mellifera* normalized using *Actin***

Relative gene expression in each brain tissue of workers normalized with *AmActin* in the *A. mellifera* sampling compared with the MBs of nurse bees collected at 6:30.

Supplementary Figure S1

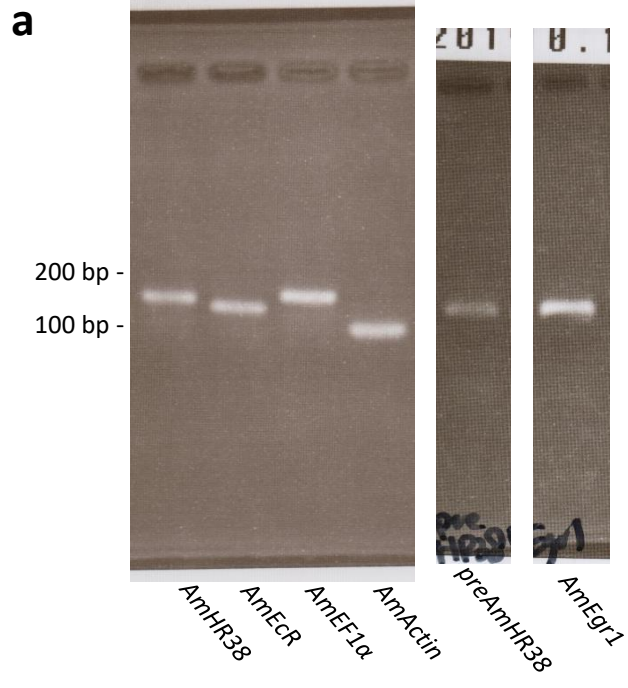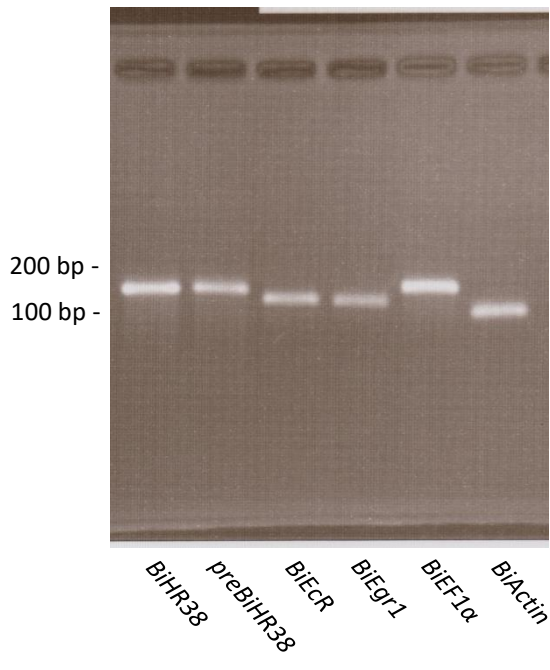

**b**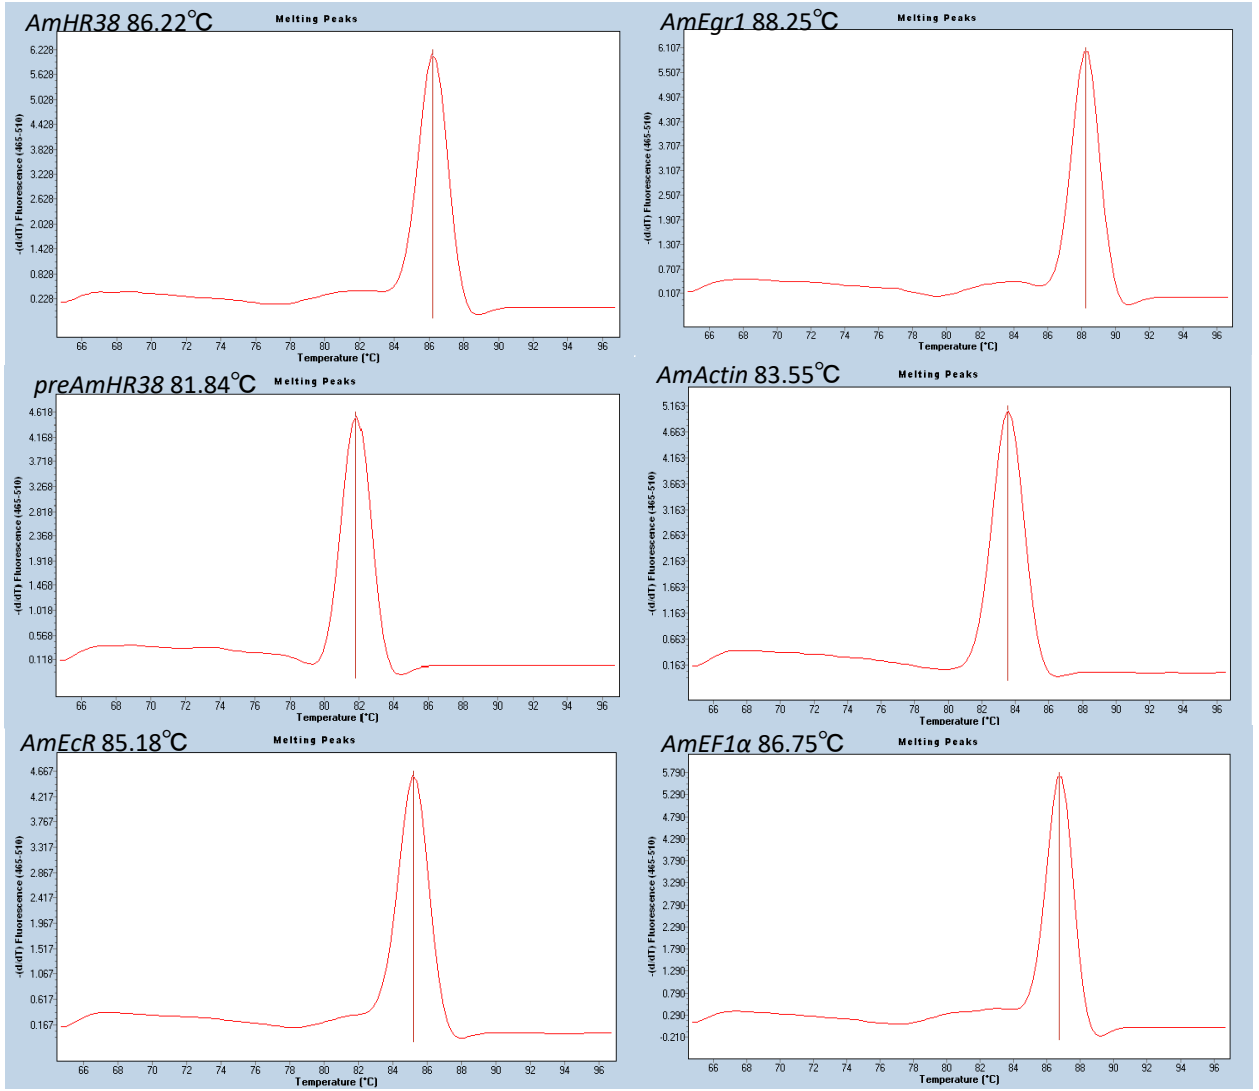

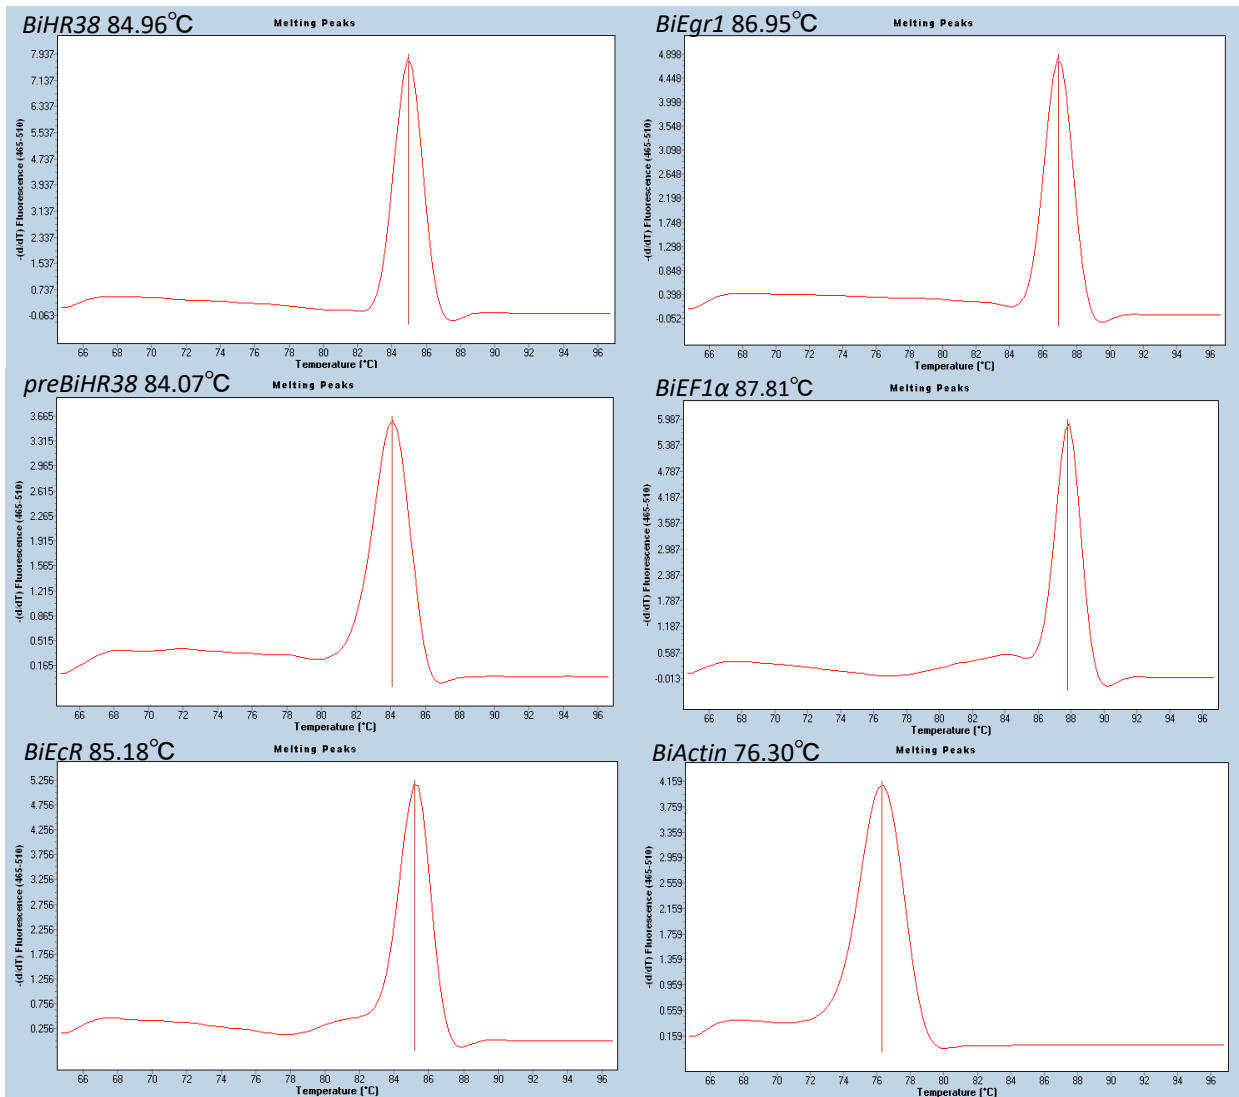

### Supplementary Figure S1. Validation selectivity of gene-specific primers

(a) Agarose gel electrophoresis of each transcript of RT-PCR using gene-specific primers. The upper panel shows RT-PCR transcript using *A. mellifera* cDNA, and the lower panel shows that using *B. ignitus* cDNA. Full-length gel images were cropped from different gels and grouped with white spaces. (b) Melting peaks of qRT-PCR.

Supplementary Figure S2

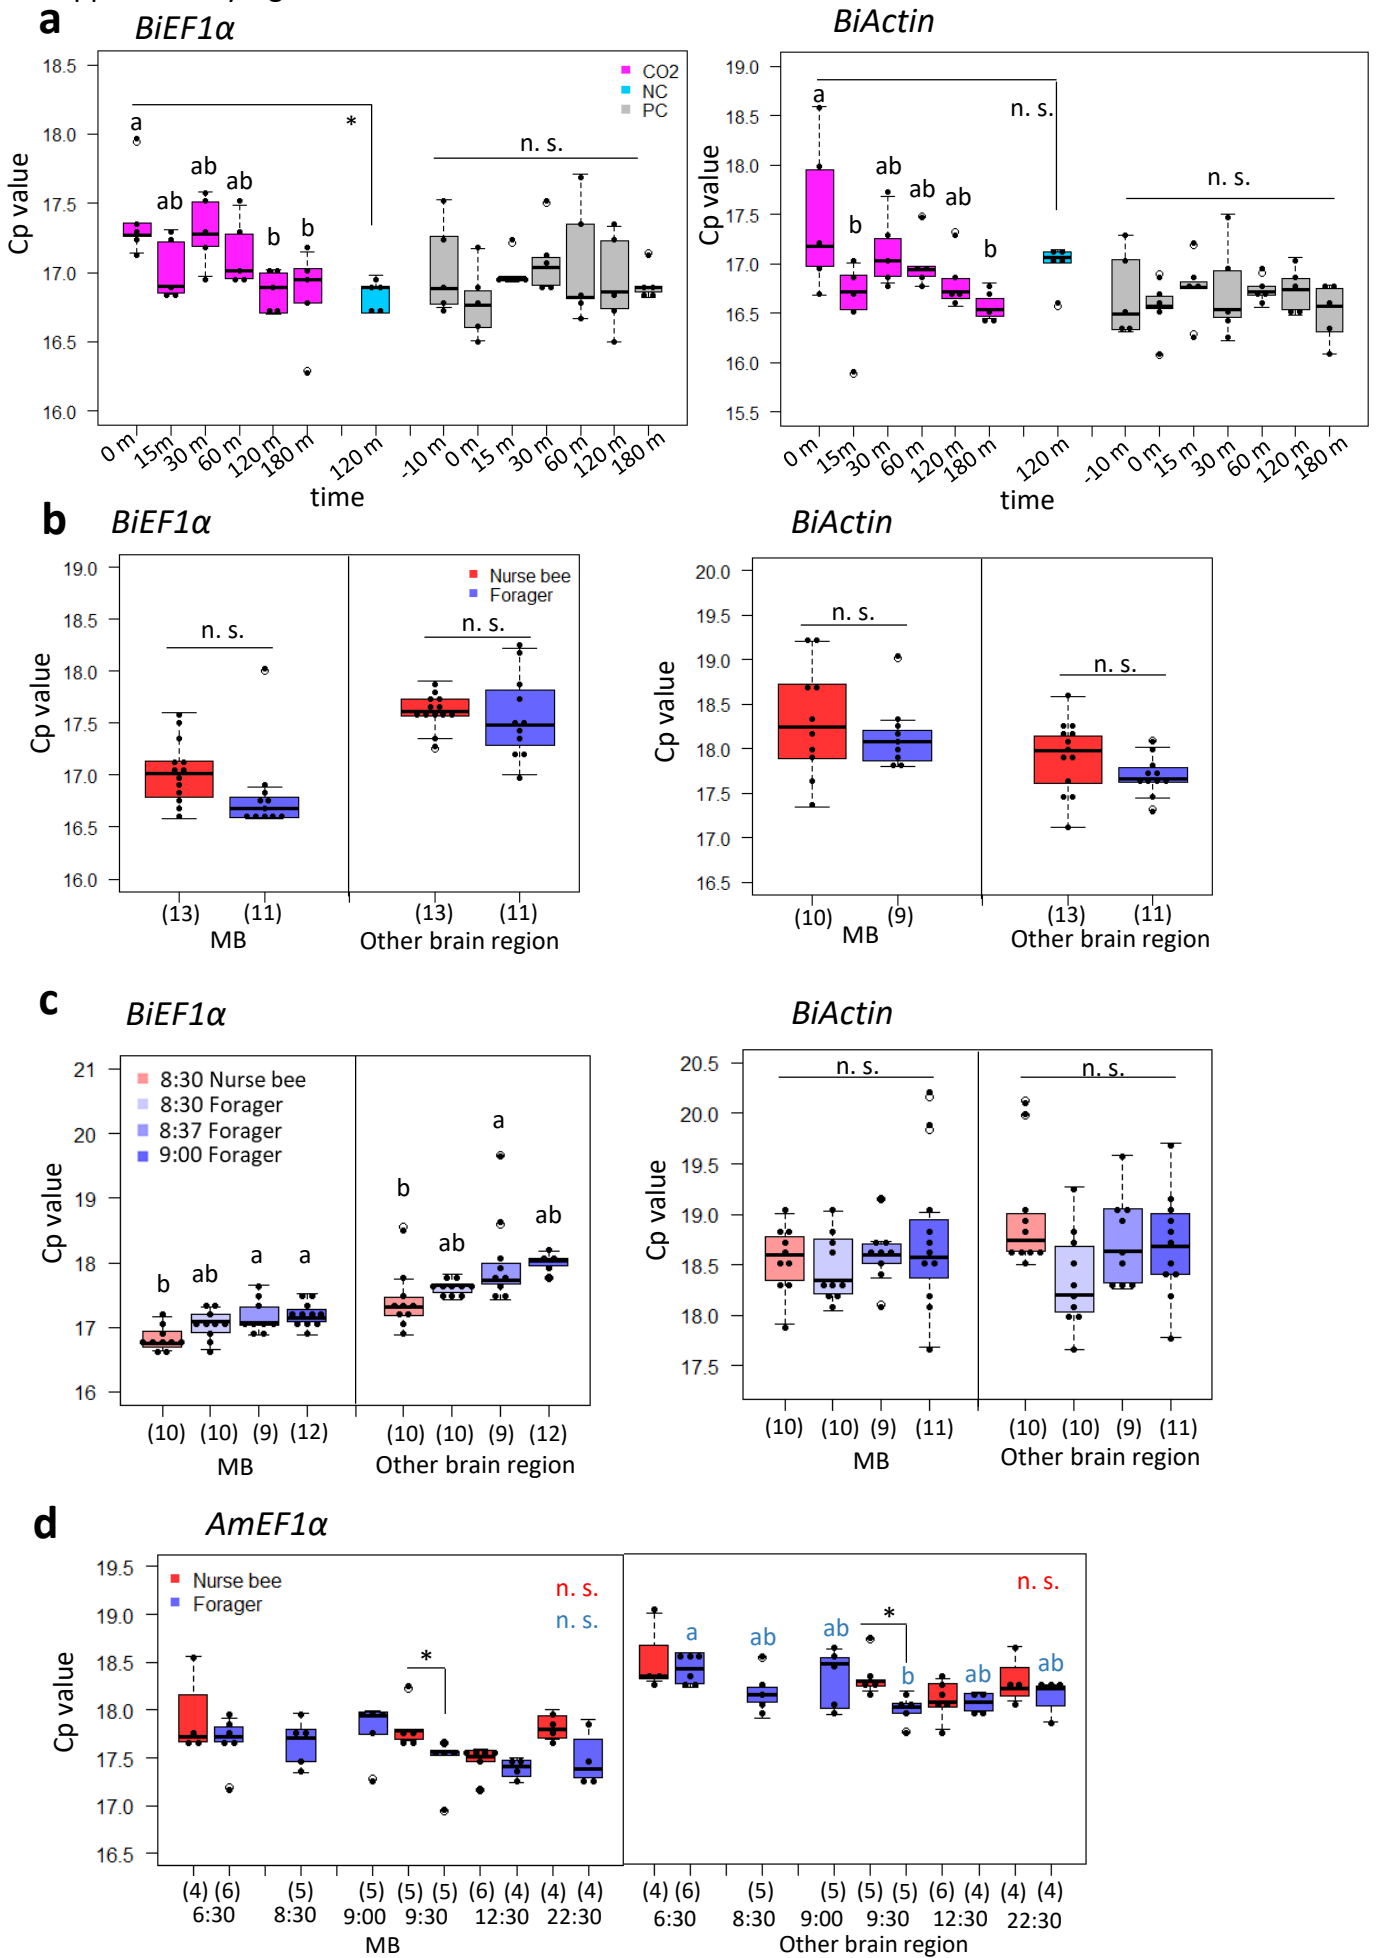

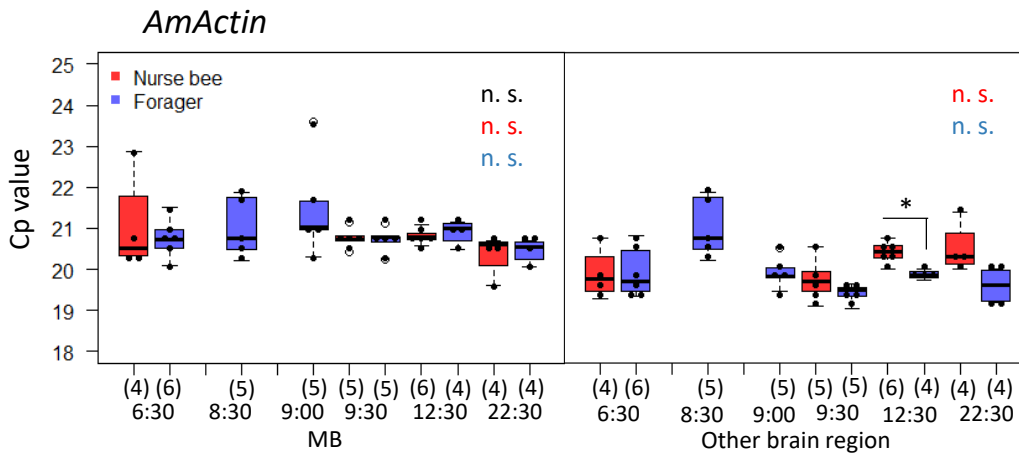

### Supplementary Figure S2. The expression levels of *EF1a* and *Actin*

Time-course of the expression after awakening from CO<sub>2</sub> anesthesia (a). Magenta indicates the group anesthetized with CO<sub>2</sub> (“CO<sub>2</sub>”), light blue indicates the negative control (“NC”, continuously anesthetized with CO<sub>2</sub> for 120 min), and gray indicates the positive control (“PC”, exposed to just an air flow). Significant differences are indicated using different letters among experimental groups ( $p < 0.05$ , Tukey-Kramer test) or asterisks between “CO<sub>2</sub>” 0 min and “NC” 120 min ( $p < 0.05$ , Student’s t test or Welch’s t test after the F test).  $n = 5$  for each sample. (b) The greenhouse experiment for *B. ignitus*. Significant differences are indicated with asterisks for each tissue ( $p < 0.05$ , Student’s t test or Welch’s t test after the F test). (c) The flight-cage experiment for *B. ignitus*. Significant differences are indicated using different letters for each brain tissue ( $p < 0.05$ , Tukey-Kramer test). (d) The experiment for *A. mellifera*. Significant differences are indicated using different letters for nurse bees (red) and foragers (blue) during the time-course ( $p < 0.05$ , Tukey-Kramer test), and asterisks (black) ( $p < 0.05$ , Student’s t test or Welch’s t test after the F test at each time-point) for each tissue. The sample size is indicated by the number in parentheses below the horizontal axis. n. s., not significant.



Supplementary Figure S3

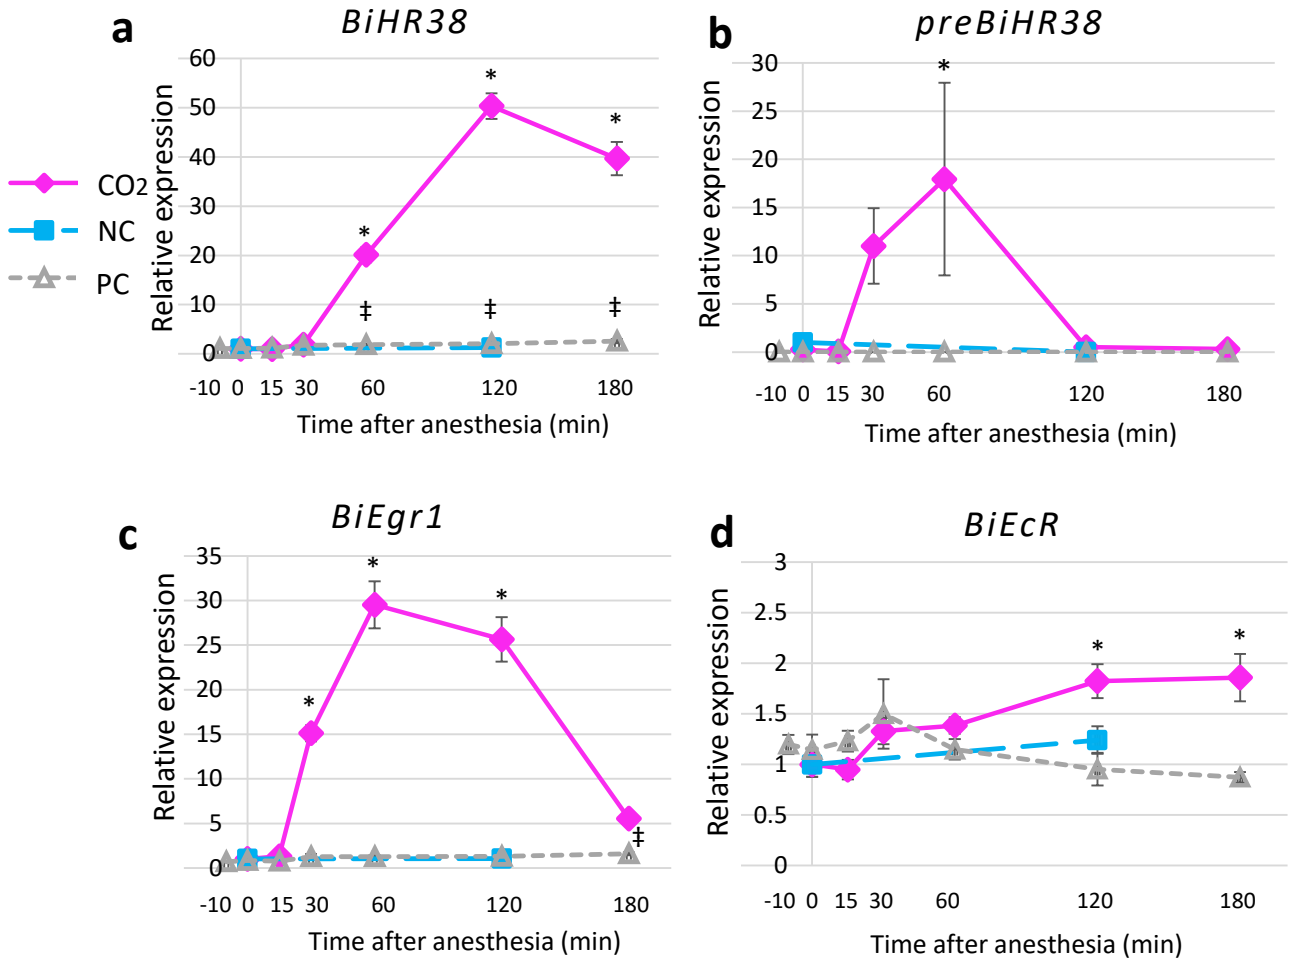

**Supplementary Figure S3. Analysis of *BiHR38*, *preBiHR38*, *BiEgr1*, and *BiEcR* expression levels after seizure induction**

Time-course of the expression of *BiHR38* (a), *preBiHR38* (b), *BiEgr1*(c), and *BiEcR* (d) after awakening from CO<sub>2</sub> anesthesia. The expression level of each gene was analyzed by qRT-PCR and normalized using *BiActin*. Magenta lines indicate the group anesthetized with CO<sub>2</sub> (“CO<sub>2</sub>”), light blue dashed lines indicate the negative control (“NC”, continuously anesthetized with CO<sub>2</sub> for 120 min), and gray dotted lines indicate the positive control (“PC”, exposed to an air flow). All data indicate means  $\pm$  SEM. Significant differences are indicated using Dunnett’s test after ANOVA (\*:p<0.05 for CO<sub>2</sub> group, ‡: p<0.05 for PC group). Student’s t test and Welch’s t test revealed no significant difference between the NC group and CO<sub>2</sub> 0-min group. n=5 for each sample.

Supplementary Figure S4

**a**

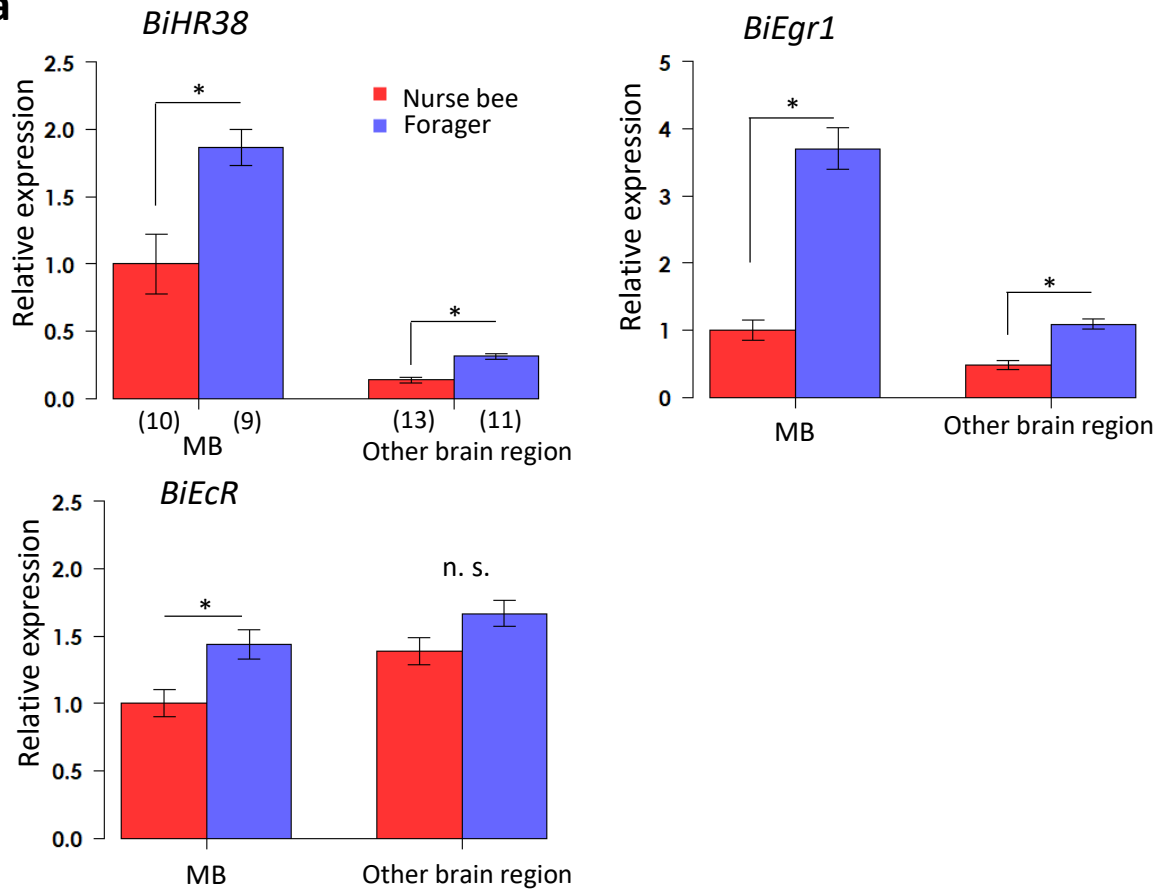

**b**

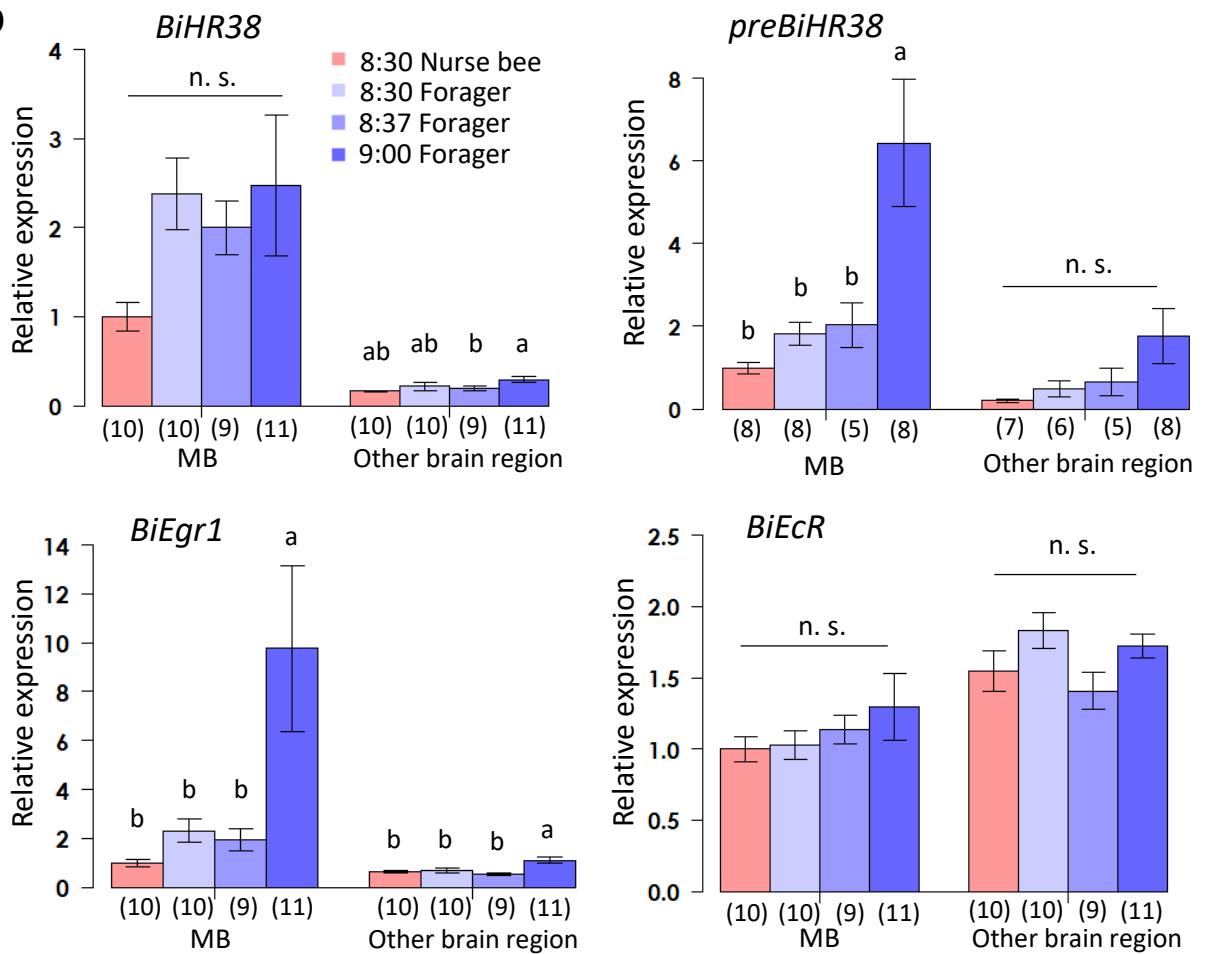

**Supplementary Figure S4. Analysis of *BiHR38*, *preBiHR38*, *BiEgr1*, and *BiEcR* expression levels during foraging flight.**

Expression analysis for the greenhouse experiment (a) and the laboratory experiment (b). The expression level of each gene was analyzed by qRT-PCR and normalized with that of *BiActin*. Each bar represents the mean  $\pm$  SEM. Significant differences are indicated by asterisks ( $p < 0.05$ , Student's t test or Welch's t test after the F test) on the error bars in (a), or different letters ( $p < 0.05$ , Tukey-Kramer test in (b), respectively). The sample size is shown below the horizontal axis in parentheses. n.s., not significant.

Supplementary Figure S5

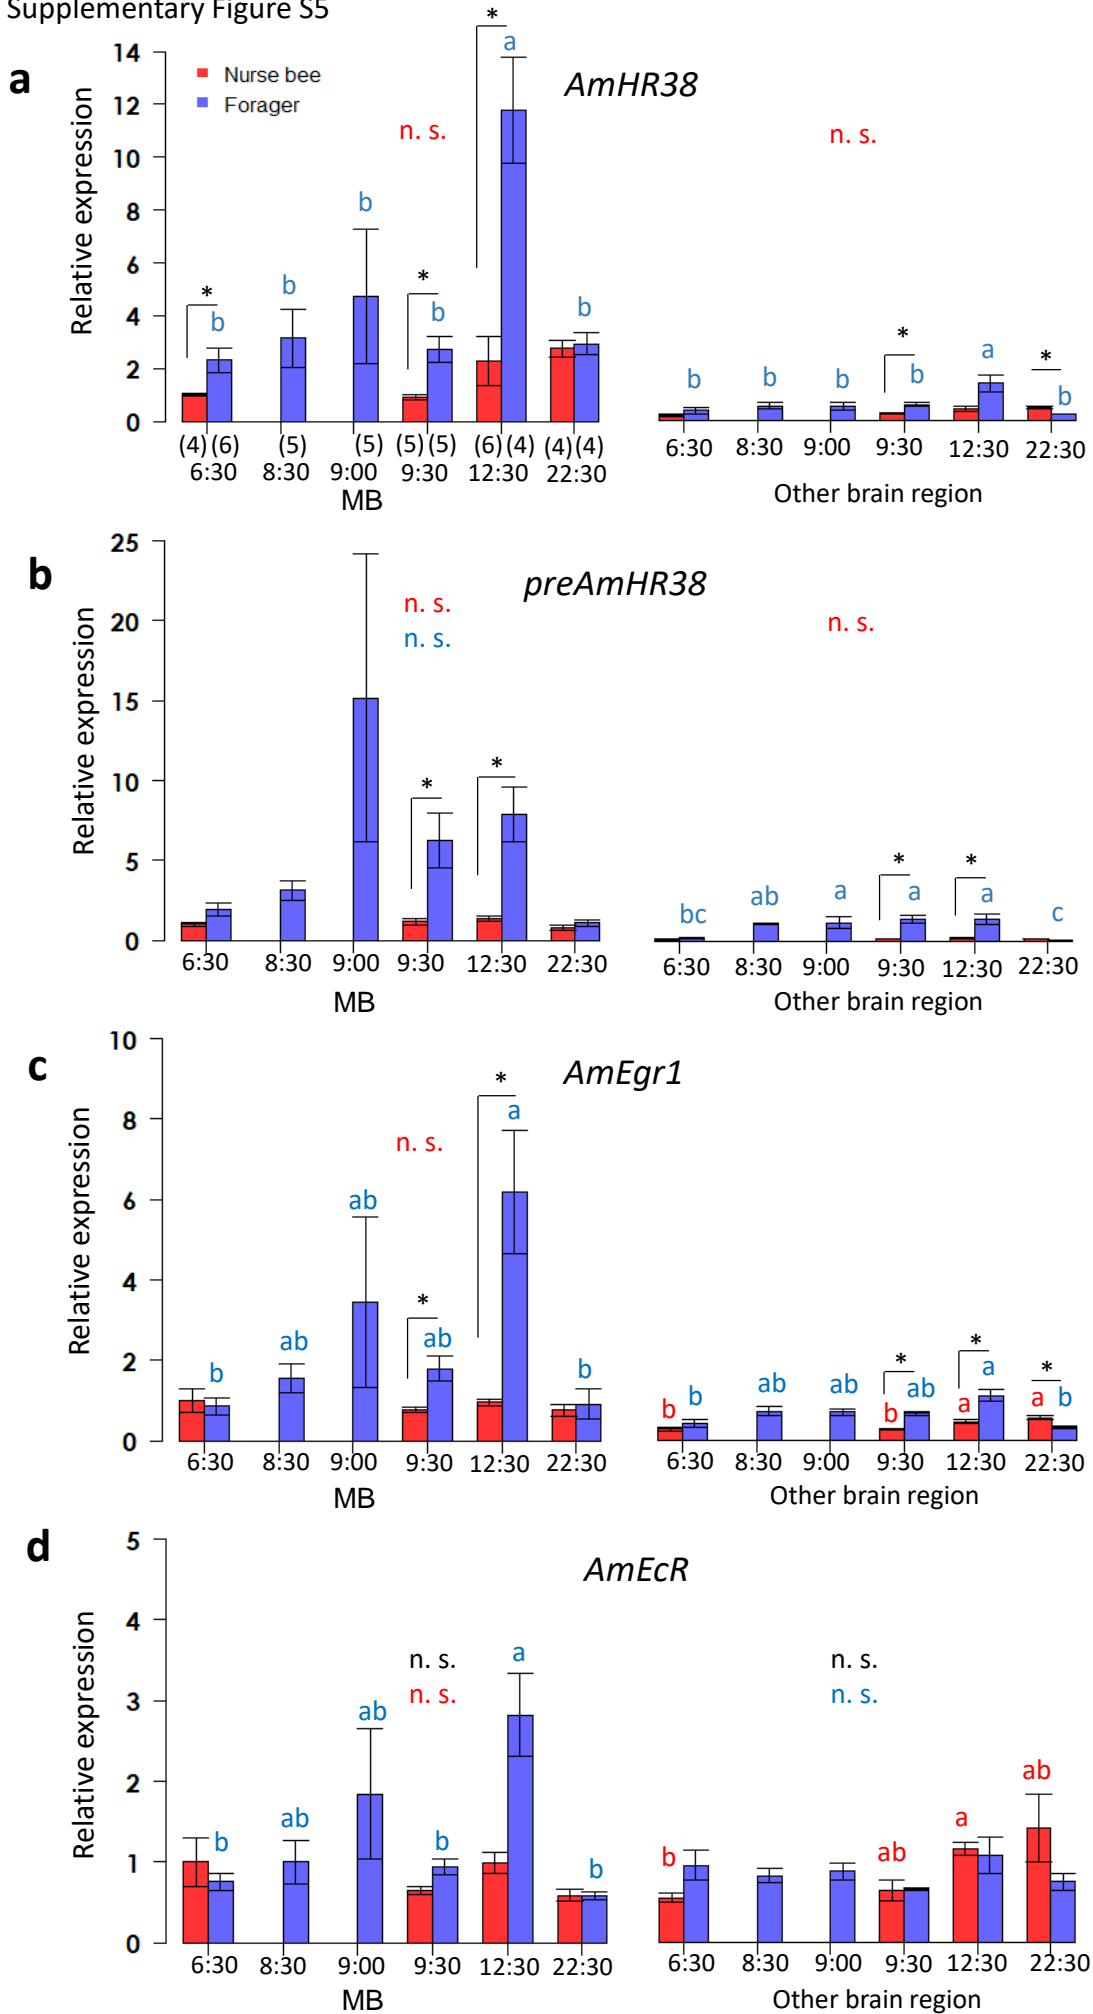

**Supplementary Figure S5 Analysis of *AmHR38*, *AmpreHR38*, *AmEgr1*, and *AmEcR* expression levels during foraging flight**

Expression levels of *AmHR38* (a), *preAmHR38*(b), *AmEgr1*(c) and *AmEcR* (d) were analyzed by qRT-PCR and normalized with that of *AmActin*. Each bar represents the mean  $\pm$  SEM. Significant differences are indicated using different letters ( $p < 0.05$ , Tukey-Kramer test for each bee type during the time-course, in each brain tissue, respectively) or asterisks ( $p < 0.05$ , Student's t test or Welch's t test after the F test) on the error bars. The sample size is shown below the horizontal axis in parentheses. Some bars are too small to see in the *preAmHR38* graph. n.s., not significant.
